# Supplementary material for: A Chitosan—Based Liposome Formulation Enhances the In Vitro Wound Healing Efficacy of Substance P Neuropeptide
Source: PubMed Central journal article supplement (PMC5750662; doi:10.3390/pharmaceutics9040056), 2017-12-06
Supplement: pharmaceutics-09-00056-s001.pdf [file pharmaceutics-09-00056-s001.pdf]

# A Chitosan – Based Liposome Formulation Enhances the *In Vitro* Wound Healing Efficacy of Substance P Neuropeptide

Tamara Mengoni <sup>1</sup>, Manuela Adrian <sup>1</sup>, Susana Pereira <sup>1</sup>, Beatriz Santos-Carballal <sup>2</sup>, Mathias Kaiser <sup>1</sup> and Francisco M. Goycoolea <sup>1,3,\*</sup>

<sup>1</sup> Institute of Plant Biology and Biotechnology (IBBP), Westfälische Wilhelms-Universität Münster, Schlossplatz 8, 48149 Münster, Germany; tamara.mengoni@gmail.com (T.M.); m\_adri02@uni-muenster.de (M.A.); ssoar\_01@uni-muenster.de (S.P.); mathiaskaiser@uni-muenster.de (M.K.)

<sup>2</sup> ChiPrO GmbH, Anne-Conway-Strasse 1, 28359 Bremen, Germany; bcarballal@chipro.de or b\_sant01@uni-muenster.de

<sup>3</sup> School of Food Science & Nutrition, University of Leeds, Leeds LS2 9JT, UK

\* Correspondence: F.M.Goycoolea@leeds.ac.uk; Tel.: +44-(0)113-343-1412

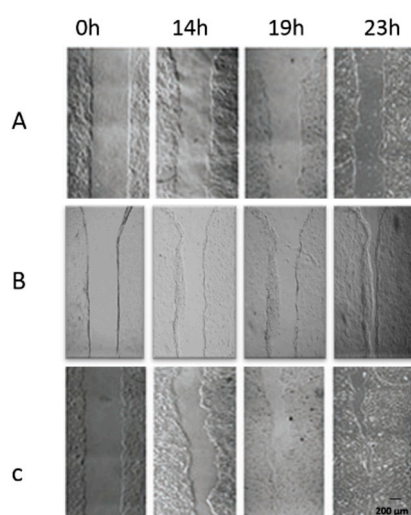

**Figure S1.** Exemplary pictures of time course wound healing. (A) shows wound progression without treatments (control), while (B) and (C) illustrate the wound progression after treatment with free SP  $1 \times 10^{-5}$  M and SP-CH-LP  $1 \times 10^{-5}$  M, respectively.
